# Supplementary material for: Optimization of Dual-Design Operation Ventilation System Network Based on Improved Genetic Algorithm
Source: Preprints.org preprint supplement (doi:10.20944/preprints202310.2104.v1), 2023-11-01
Supplement: Supplementary file 1 [file hydcal.xlsx]

## Sheet: hydcal
no	connections	cmh	length	width	height
1	2	5150	4.5	800	400
2	3,39	5150	1.03	800	400
3	4,31	3450	0.23	800	400
4	5,30	2850	3.46	500	400
5	6,29	2650	0.66	500	400
6	7,28	2450	6.29	500	400
7	8,27	2250	0.66	500	400
8	9,26	2050	6.29	500	400
9	10,25	1850	0.66	500	400
10	11,24	1650	6.29	500	400
11	12,23	1450	3.92	500	400
12	13	1000	0.91	500	400
13	14,22	1000	2.68	400	200
14	15,21	800	6.29	400	200
15	16,20	600	0.66	400	200
16	17,19	400	6.29	400	200
17	18	200	0.71	400	200
18		200	5.45	250	120
19		200	5.45	250	120
20		200	5.45	250	120
21		200	5.45	250	120
22		200	5.44	250	120
23		450	6.17	400	160
24		200	5.45	250	120
25		200	5.44	250	120
26		200	5.44	250	120
27		200	5.44	250	120
28		200	5.44	250	120
29		200	5.44	250	120
30		200	5.44	250	120
31	32,38	600	1.06	250	200
32	33,37	400	0.66	250	120
33	34	200	0.81	250	200
34	35	200	2	250	120
35	36	200	0.49	250	120
36		200	2.43	250	120
37		200	5.44	250	120
38		200	5.44	250	120
39	40,51	1700	13.27	400	250
40	41	1200	0.34	400	250
41	42,50	1200	7.13	400	200
42	43,49	1100	0.61	400	200
43	44,48	800	6.45	400	200
44	45,47	700	0.35	400	200
45	46	100	0.35	250	160
46		100	3.51	200	120
47		600	1.65	400	160
48		100	3.44	200	120
49		300	3.21	320	120
50		100	2.28	200	120
51	52	500	2.84	200	200
52	53,57	500	2.83	200	200
53	54,56	300	5.21	200	200
54	55	200	2.55	200	200
55		200	4.82	250	120
56		100	4.77	200	120
57		200	4.72	250	120
