# Supplementary material for: Optimization of Dual-Design Operation Ventilation System Network Based on Improved Genetic Algorithm
Source: Preprints.org preprint supplement (doi:10.20944/preprints202310.2104.v1), 2023-11-01
Supplement: Supplementary file 2 [file Encoding rule.docx]

The air duct diameters and the corresponding integer encoding rule is shown in Table 1.

Table 1 Encoding rule

| **Width(mm)** | **Height(mm)** | **Area(m2)** | **Integer code** |
| --- | --- | --- | --- |
| 120 | 120 | 0.0144 | 1 |
| 160 | 120 | 0.0192 | 2 |
| 200 | 120 | 0.0240 | 3 |
| 160 | 160 | 0.0256 | 4 |
| 250 | 120 | 0.0300 | 5 |
| 200 | 160 | 0.0320 | 6 |
| 320 | 120 | 0.0384 | 7 |
| 200 | 200 | 0.0400 | 8 |
| 250 | 160 | 0.0400 | 9 |
| 250 | 200 | 0.0500 | 10 |
| 320 | 160 | 0.0512 | 11 |
| 250 | 250 | 0.0625 | 12 |
| 320 | 200 | 0.0640 | 13 |
| 400 | 160 | 0.0640 | 14 |
| 320 | 250 | 0.0800 | 15 |
| 400 | 200 | 0.0800 | 16 |
| 400 | 250 | 0.1000 | 17 |
| 500 | 200 | 0.1000 | 18 |
| 320 | 320 | 0.1024 | 19 |
| 500 | 250 | 0.1250 | 20 |
| 400 | 320 | 0.1280 | 21 |
| 630 | 250 | 0.1575 | 22 |
| 400 | 400 | 0.1600 | 23 |
| 500 | 320 | 0.1600 | 24 |
| 500 | 400 | 0.2000 | 25 |
| 630 | 320 | 0.2016 | 26 |
| 500 | 500 | 0.2500 | 27 |
| 630 | 400 | 0.2520 | 28 |
| 800 | 320 | 0.2560 | 29 |
| 800 | 400 | 0.3200 | 30 |
| 800 | 500 | 0.4000 | 31 |
| 1000 | 400 | 0.4000 | 32 |
